# Supplementary material for: GSK3β palmitoylation mediated by ZDHHC4 promotes tumorigenicity of glioblastoma stem cells in temozolomide-resistant glioblastoma through the EZH2–STAT3 axis
Source: PubMed Central journal article supplement (PMC9126914; doi:10.1038/s41389-022-00402-w), 2022-05-23
Supplement: 41389_2022_402_MOESM2_ESM.pdf [file 41389_2022_402_MOESM2_ESM.pdf]

In accordance with Springer Nature Authorship Policy we agree to change the authors of the manuscript as indicated below.

NAME OF JOURNAL: oncogenesis

TITLE OF MANUSCRIPT: GSK3 $\beta$  palmitoylation mediated by ZDHHC4 promotes tumorigenicity of glioblastoma stem cells in temozolomide-resistant glioblastoma through the EZH2 - STAT3 axis

MANUSCRIPT NUMBER: ONCSIS-22-0065

CORRESPONDING AUTHORS NAME: Bing Zhao, Zhiyou Fang and Xueran Chen

**PREVIOUS AUTHOR NAMES:**

Chenggang Zhao PhD, Huihan Yu MD, Xiaoqing Fan PhD, Wanxiang Niu PhD, Junqi Fan MD, Suling Sun MD, Meiting Gong MD, Zhiyou Fang PhD,\* Xueran Chen PhD,#

**UPDATED AUTHOR NAMES:**

Chenggang Zhao PhD, Huihan Yu MD, Xiaoqing Fan PhD, Wanxiang Niu PhD, Junqi Fan MD, Suling Sun MD, Meiting Gong MD, Bing Zhao, PhD,\* Zhiyou Fang PhD,\* Xueran Chen PhD,#

**CHANGE TO AUTHOR LIST:**

Chenggang Zhao PhD, Huihan Yu MD, Xiaoqing Fan PhD, Wanxiang Niu PhD, Junqi Fan MD, Suling Sun MD, Meiting Gong MD, Bing Zhao, PhD,\* Zhiyou Fang PhD,\* Xueran Chen PhD,#

| Print Name     | Signature             | Date      |
|----------------|-----------------------|-----------|
| Chenggang Zhao | <i>Chenggang Zhao</i> | 2022-4-15 |
| Huihan Yu      | <i>Huihan Yu</i>      | 2022-4-15 |
| Xiaoqing Fan   | <i>Xiaoqing Fan</i>   | 2022-4-15 |
| Wanxiang Niu   | <i>Wanxiang Niu</i>   | 2022-4-15 |
| Junqi Fan      | <i>Junqi Fan</i>      | 2022-4-15 |
| Suling Sun     | <i>Suling Sun</i>     | 2022-4-15 |
| Meiting Gong   | <i>Meiting Gong</i>   | 2022-4-15 |
| Bing Zhao      | <i>Bing Zhao</i>      | 2022-4-15 |
| Zhiyou Fang    | <i>Zhiyou Fang</i>    | 2022-4-15 |
| Xueran Chen    | <i>Xueran Chen</i>    | 2022-4-15 |
